# Supplementary material for: Response kinetics as a dynamic prognostic marker in patients with multiple myeloma
Source: Research Square preprint supplement (doi:10.21203/rs.3.rs-7446348/v1), 2025-09-04
Supplement: Supplementary file 1 [file 42305c855bed387f2adb6260.pdf]

**Table S1. Baseline characteristics of all patients (N=384)**

| Characteristics                      | No. (%)    |
|--------------------------------------|------------|
| Age, median (range) years            |            |
| ≥65 years                            | 194 (50.5) |
| Sex                                  |            |
| Male                                 | 215 (56.0) |
| Female                               | 169 (44.0) |
| ISS stage                            |            |
| I                                    | 82 (21.4)  |
| II                                   | 121 (31.5) |
| III                                  | 161 (41.9) |
| Unknown                              | 20 (5.2)   |
| R-ISS stage                          |            |
| I                                    | 28 (7.3)   |
| II                                   | 207 (53.9) |
| III                                  | 87 (22.7)  |
| Unknown                              | 62 (16.1)  |
| Cytogenetics abnormalities           |            |
| Standard risk                        | 200 (52.1) |
| High risk*                           | 94 (24.5)  |
| Unknown                              | 90 (23.4)  |
| Bortezomib exposure                  |            |
| Yes                                  | 330 (84.6) |
| Upfront ASCT                         |            |
| Yes                                  | 143 (37.2) |
| Early relapse                        |            |
| <2 years                             | 224 (58.3) |
| Second-line therapy                  |            |
| Carfilzomib based                    | 310 (80.7) |
| Ixazomib based                       | 74 (19.3)  |
| Best response to second-line therapy |            |
| CR                                   | 123 (32.0) |
| VGRP                                 | 96 (25.0)  |
| PR                                   | 104 (27.1) |
| SD                                   | 27 (7.0)   |
| PD                                   | 13 (3.4)   |
| Not evaluated                        | 21 (5.5)   |

\*High-risk cytogenetics: presence of del(17p) and/or translocation t(4;14) and/or translocation t(14;16) by iFISH

**Table S2. Univariate and multivariate Cox regression analysis for PFS in rapid and slow responders (n=223)**

**(A) At diagnosis**

|                                                             | PFS                 |         |                     |         |
|-------------------------------------------------------------|---------------------|---------|---------------------|---------|
|                                                             | Univariate          |         | Multivariate        |         |
|                                                             | HR (95% CI)         | P value | HR (95% CI)         | P value |
| Age<br>(≥65 years vs. <65 years)                            | 0.876 (0.583–1.316) | 0.523   |                     |         |
| ISS stage<br>(III vs. I)                                    | 1.219 (0.934–1.590) | 0.145   |                     |         |
| R-ISS stage<br>(III vs. I)                                  | 1.274 (0.862–1.883) | 0.225   |                     |         |
| Cytogenetics abnormalities<br>(High vs. Standard)           | 1.651 (1.000–2.728) | 0.050   | 1.451 (0.874–2.407) | 0.150   |
| Bortezomib exposure<br>(Yes vs. No)                         | 1.128 (0.639–1.991) | 0.6786  |                     |         |
| Upfront ASCT<br>(Yes vs. No)                                | 1.115 (0.739–1.680) | 0.604   |                     |         |
| Early relapse<br>(<2 years vs. ≥2 years)                    | 1.048 (0.699–1.573) | 0.824   |                     |         |
| Response kinetics<br>(Slow responders vs. Rapid responders) | 0.612 (0.495–0.757) | <0.001  | 0.646 (0.507–0.824) | <0.001  |

**Abbreviations:** PFS, progression-free survival; HR, hazard ratio; CI, confidence interval; ISS, International Staging System; R-ISS, Revised-International Staging System; ASCT, autologous stem-cell transplantation.

**(B) At second-line therapy**

|                                                     | PFS                 |         |                     |         |
|-----------------------------------------------------|---------------------|---------|---------------------|---------|
|                                                     | Univariate          |         | Multivariate        |         |
|                                                     | HR (95% CI)         | P value | HR (95% CI)         | P value |
| Second-line treatment<br>(Ixazomib vs. Caflizomib)  | 1.505 (0.931–2.433) | 0.095   | 0.713 (0.292–1.736) | 0.456   |
| Albumin<br>(≥3.5 mg/dL vs. <3.5 mg/dL)              | 0.427 (0.275–0.663) | < 0.001 | 0.472 (0.220–1.013) | 0.0539  |
| LDH (High vs. Low)                                  | 0.880 (0.527–1.469) | 0.624   |                     |         |
| Beta-2 microglobulin<br>(≥3.5 mg/dL vs. <3.5 mg/dL) | 1.801 (0.966–3.356) | 0.064   | 1.798 (0.805–4.020) | 0.153   |
| Creatinine<br>(>2 mg/dL vs. ≤2.0 mg/dL)             | 0.936 (0.432–2.025) | 0.866   |                     |         |
| Calcium<br>(>11.0 mg/dL vs. <11.0 mg/dL)            | 0.000 (0–inf)       | 0.996   |                     |         |

|                                                             |                     |        |                     |                  |
|-------------------------------------------------------------|---------------------|--------|---------------------|------------------|
| Plasmacytoma<br>(Yes vs. No)                                | 3.473 (2.031–5.940) | <0.001 | 2.393 (1.058–5.414) | <b>0.036</b>     |
| Light chain difference<br>(≥300 vs. <300)                   | 1.253 (0.823–1.908) | 0.293  |                     |                  |
| Hb.<br>(≥10.0 g/dL vs. <10.0 g/dL)                          | 0.396 (0.527–0.609) | <0.001 | 0.463 (0.202–1.063) | 0.069            |
| Platelets<br>(≥100,000 /μL vs. <100,000/μL)                 | 0.522 (0.324–0.840) | 0.007  | 1.235 (0.512–2.981) | 0.638            |
| ALC/WBC ratio<br>(≥20% vs <20%)                             | 1.264 (0.634–2.520) | 0.506  |                     |                  |
| Best response to second-line therapy<br>(PR vs. CR)         | 1.668 (1.300–2.139) | <0.001 | 1.595 (1.055–2.412) | <b>0.027</b>     |
| Response kinetics<br>(Slow responders vs. Rapid responders) | 0.612 (0.495–0.757) | <0.001 | 0.454 (0.304–0.678) | <b>&lt;0.001</b> |

**Abbreviations:** PFS, progression-free survival; HR, hazard ratio; CI, confidence interval; LDH, lactate dehydrogenase; Hb., hemoglobin; ALC/WBC, absolute lymphocyte count/white blood cell count; CR, complete response; PR, partial response.

**Table S2. Univariate and multivariate Cox regression analysis for OS in rapid and slow responders (n=223)**

**(A) At diagnosis**

|                                                             | OS                  |        |                     |              |
|-------------------------------------------------------------|---------------------|--------|---------------------|--------------|
|                                                             | Univariate          |        | Multivariate        |              |
|                                                             | HR (95% CI)         |        | HR (95% CI)         |              |
| Age<br>(≥65 years vs. <65 years)                            | 1.347 (0.889–2.042) | 0.160  |                     |              |
| ISS stage<br>(III vs. I)                                    | 1.434 (1.080–1.904) | 0.013  | 1.212 (0.859–1.711) | 0.274        |
| R-ISS stage<br>(III vs. I)                                  | 1.460 (0.980–2.176) | 0.063  |                     |              |
| Cytogenetics abnormalities<br>(High vs. Standard)           | 1.627 (0.973–2.722) | 0.064  | 1.199 (0.679–2.116) | 0.532        |
| Bortezomib exposure<br>(Yes vs. No)                         | 0.965 (0.554–1.680) | 0.8995 |                     |              |
| Upfront ASCT<br>(Yes vs. No)                                | 0.909 (0.593–1.395) | 0.662  |                     |              |
| Early relapse<br>(<2 years vs. ≥2 years)                    | 1.503 (0.981–2.302) | 0.061  | 1.920 (1.107–3.329) | <b>0.020</b> |
| Response kinetics<br>(Slow responders vs. Rapid responders) | 0.696 (0.563–0.861) | <0.001 | 0.756 (0.578–0.988) | <b>0.040</b> |

**Abbreviations:** OS, overall survival; HR, hazard ratio; CI, confidence interval; ISS, International Staging System; R-ISS, Revised-International Staging System; ASCT, autologous stem-cell transplantation.

**(B) At second-line therapy**

|                                                     | OS                    |         |                      |         |
|-----------------------------------------------------|-----------------------|---------|----------------------|---------|
|                                                     | Univariate            |         | Multivariate         |         |
|                                                     | HR (95% CI)           | P value | HR (95% CI)          | P value |
| Second-line treatment<br>(Ixazomib vs. Cafilzomib)  | 0.748 (0.415–1.350)   | 0.335   |                      |         |
| Albumin<br>(≥3.5 mg/dL vs. <3.5 mg/dL)              | 0.525 (0.338–0.816)   | 0.001   | 0.4802 (0.204–1.130) | 0.093   |
| LDH (High vs. Low)                                  | 1.953 (1.222–3.118)   | 0.005   | 1.116 (0.494–2.524)  | 0.791   |
| Beta-2 microglobulin<br>(≥3.5 mg/dL vs. <3.5 mg/dL) | 2.134 (1.161–3.921)   | 0.014   | 1.261 (0.551–2.885)  | 0.583   |
| Creatinine<br>(>2 mg/dL vs. ≤2.0 mg/dL)             | 1.436 (0.746–2.775)   | 0.281   |                      |         |
| Calcium<br>(>11.0 mg/dL vs. <11.0 mg/dL)            | 3.726 (0.9054–15.330) | 0.068   |                      |         |

|                                                             |                     |        |                      |              |
|-------------------------------------------------------------|---------------------|--------|----------------------|--------------|
| Plasmacytoma<br>(Yes vs. No)                                | 1.773 (1.007–3.121) | 0.047  | 1.846 (0.771–4.419)  | 0.169        |
| Light chain difference<br>(≥300 vs. <300)                   | 1.203 (0.793–1.824) | 0.385  |                      |              |
| Hb.<br>(≥10.0 g/dL vs. <10.0 g/dL)                          | 0.431 (0.282–0.659) | <0.001 | 0.828 (0.356 –1.928) | 0.662        |
| Platelets<br>(≥100,000 /μL vs. <100,000/μL)                 | 0.395 (0.253–0.615) | <0.001 | 0.728 (0.309–1.717)  | 0.469        |
| ALC/WBC ratio<br>(≥20% vs <20%)                             | 0.434 (0.263–0.716) | 0.001  | 0.403 (0.138–1.178)  | 0.097        |
| Best response to second-line therapy<br>(PR vs. CR)         | 1.427 (1.118–1.821) | 0.004  | 1.816 (1.159–2.843)  | <b>0.009</b> |
| Response kinetics<br>(Slow responders vs. Rapid responders) | 0.696 (0.563–0.861) | <0.001 | 0.628 (0.420–0.941)  | <b>0.024</b> |

**Abbreviations:** OS, overall survival; HR, hazard ratio; CI, confidence interval; LDH, lactate dehydrogenase; Hb., hemoglobin; ALC/WBC, absolute lymphocyte count/white blood cell count; CR, complete response; PR, partial response.

Figure S1. CONSORT diagram

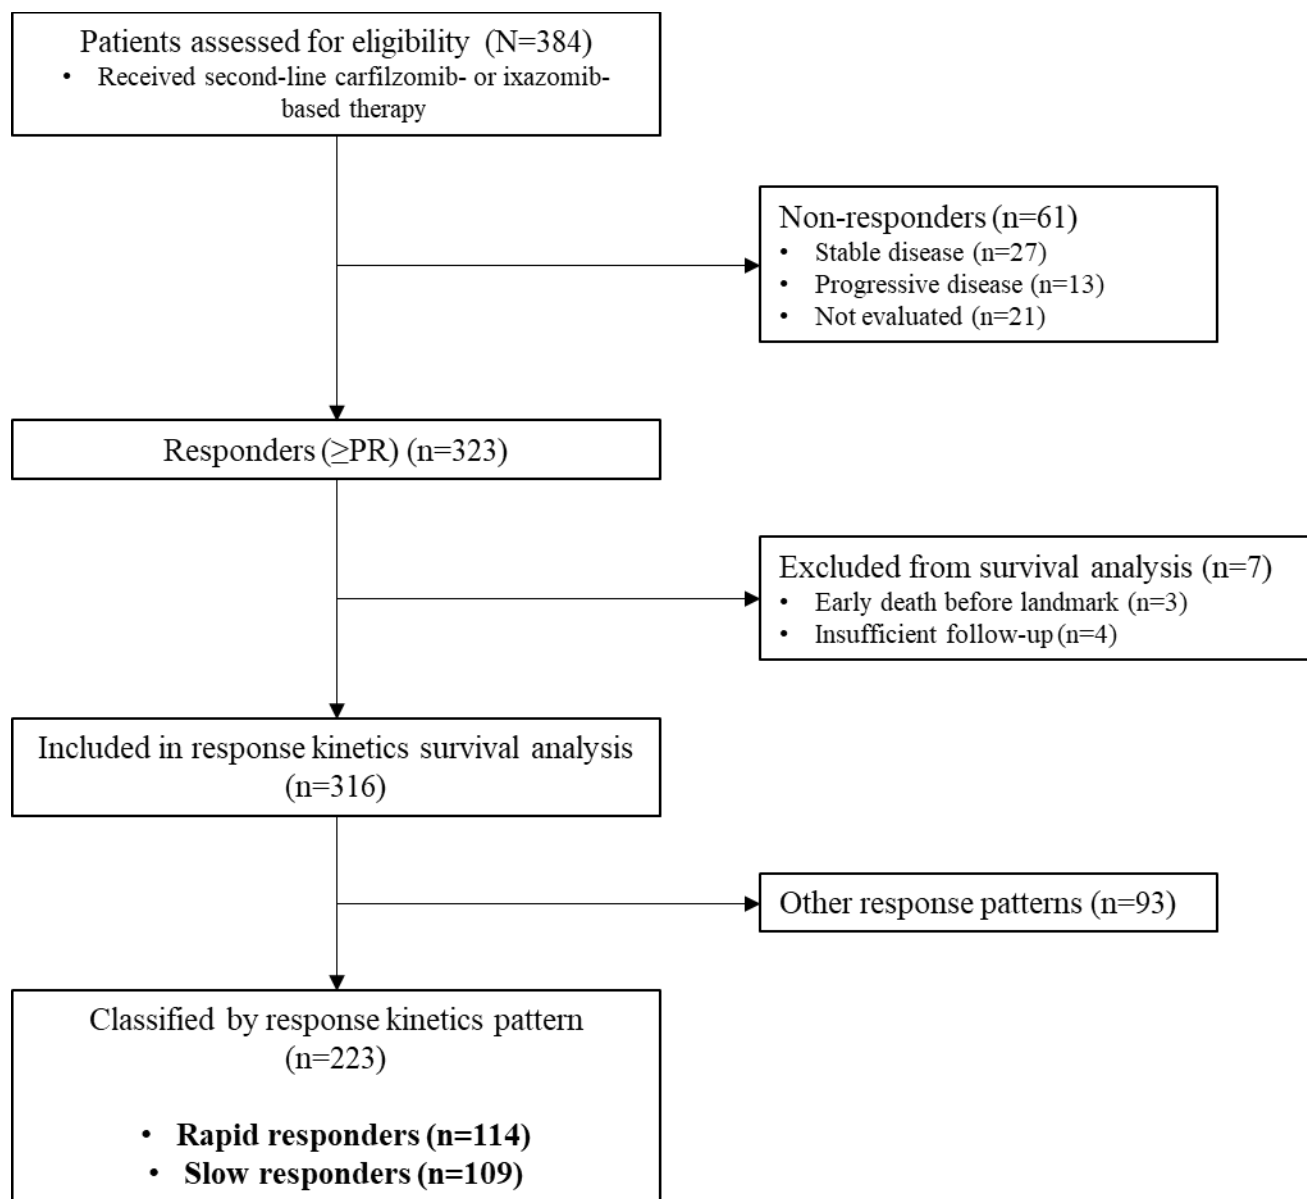

Figure S2. Survival outcomes according to the time to first response after second-line therapy with landmark analysis (n=316)

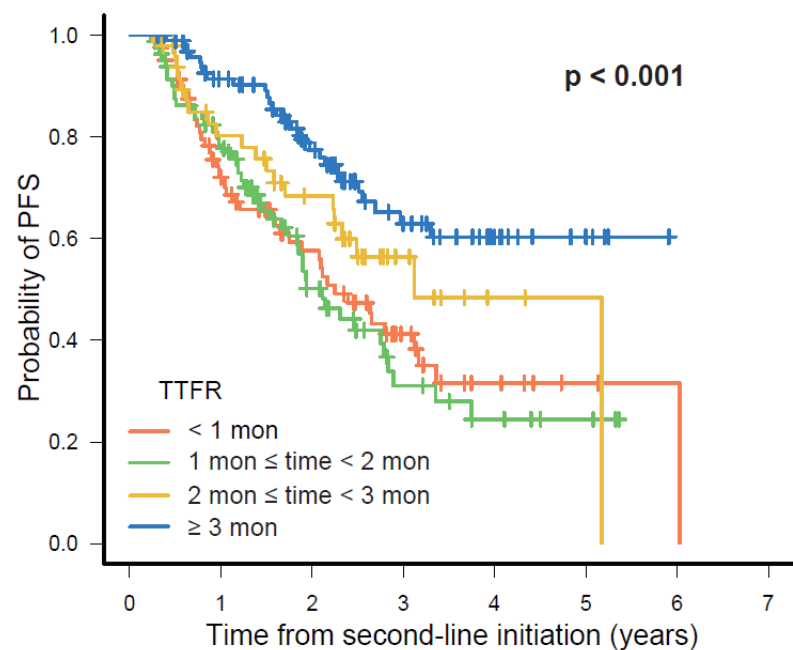

|    |    |    |    |    |   |   |   |
|----|----|----|----|----|---|---|---|
| 84 | 53 | 34 | 15 | 6  | 2 | 1 | 0 |
| 84 | 59 | 28 | 11 | 6  | 3 | 0 | 0 |
| 50 | 35 | 25 | 8  | 2  | 1 | 0 | 0 |
| 98 | 81 | 54 | 27 | 13 | 4 | 0 | 0 |

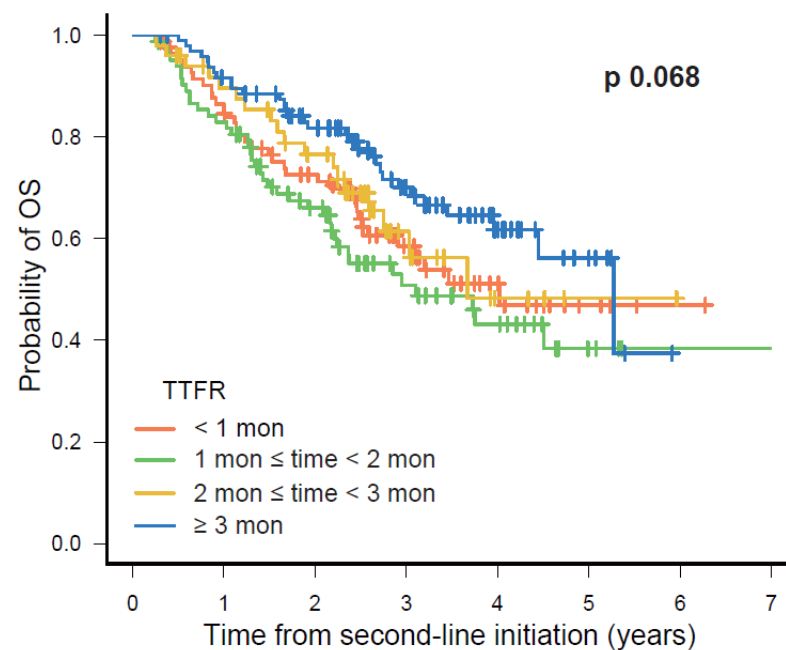

|    |    |    |    |    |   |   |   |
|----|----|----|----|----|---|---|---|
| 84 | 70 | 54 | 27 | 13 | 4 | 1 | 0 |
| 84 | 68 | 46 | 24 | 15 | 4 | 1 | 1 |
| 50 | 42 | 32 | 12 | 4  | 1 | 0 | 0 |
| 98 | 87 | 69 | 41 | 20 | 6 | 0 | 0 |

Figure S3. Survival outcomes according to the time to best response after second-line therapy with landmark analysis (n=316)

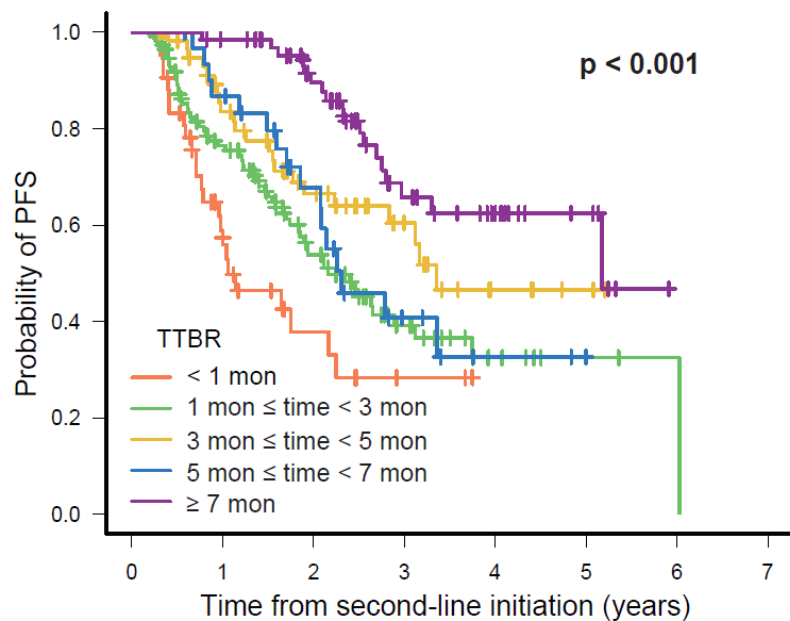

|     |    |    |    |    |   |   |   |
|-----|----|----|----|----|---|---|---|
| 44  | 20 | 8  | 2  | 0  | 0 | 0 | 0 |
| 115 | 76 | 42 | 17 | 6  | 2 | 1 | 0 |
| 60  | 44 | 28 | 14 | 5  | 2 | 0 | 0 |
| 32  | 26 | 16 | 6  | 2  | 0 | 0 | 0 |
| 65  | 62 | 47 | 22 | 14 | 6 | 0 | 0 |

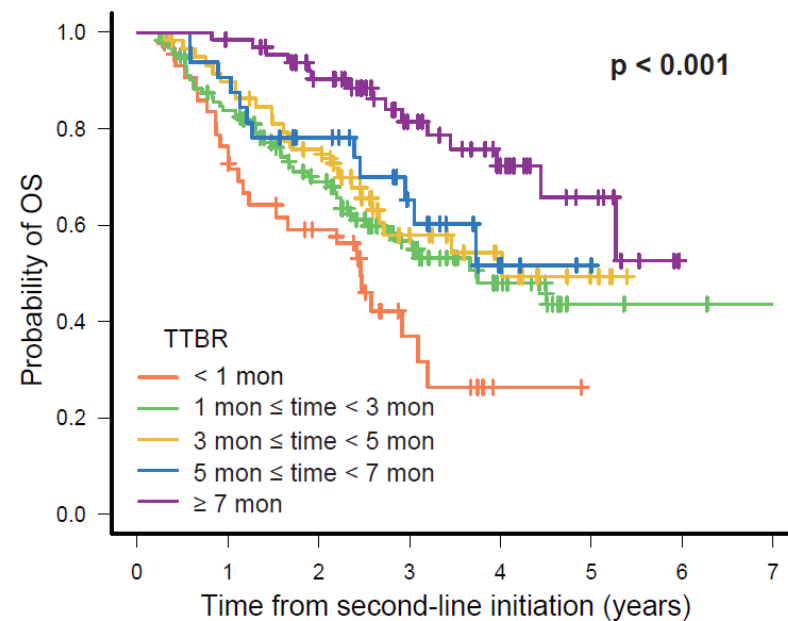

|     |    |    |    |    |   |   |   |
|-----|----|----|----|----|---|---|---|
| 44  | 32 | 21 | 7  | 1  | 0 | 0 | 0 |
| 115 | 91 | 65 | 34 | 16 | 3 | 2 | 1 |
| 60  | 52 | 41 | 19 | 11 | 4 | 0 | 0 |
| 32  | 29 | 22 | 13 | 4  | 0 | 0 | 0 |
| 65  | 63 | 52 | 31 | 20 | 8 | 0 | 0 |
